# Supplementary material
Source: publisher site journal article supplement (https://www.dovepress.com/article/supplementary_file/617690/617690%20Supplementary%20Material.docx)
Supplement: Supplementary file 1 [file 617690%20Supplementary%20Material.docx]

**Supplementary Table 1. Optimization results of the HBC–2% carteolol formulation ratios**

| **Parameter** | **10:1** | **10:2** | **10:3** | **10:4** | **10:5** | **10:6** | **10:7** | **10:8** |
| --- | --- | --- | --- | --- | --- | --- | --- | --- |
| **HBC:2% carteolol ratio (v/v)** | 10:1 | 10:2 | 10:3 | 10:4 | 10:5 | 10:6 | 10:7 | 10:8 |
| **Gelation temperature (°C)** | 18 | 19 | 19 | 22 | 23 | 26 | No gelation | No gelation |
| **Appearance and homogeneity** | Homogeneous; no visible precipitation | Homogeneous; no visible precipitation | Homogeneous; no visible precipitation | Homogeneous; no visible precipitation | Homogeneous; no visible precipitation | Homogeneous; no visible precipitation | Homogeneous; no visible precipitation | Homogeneous; no visible precipitation |
| **Low-temperature appearance** | Transparent at low temperature | Transparent at low temperature | Transparent at low temperature | Transparent at low temperature | Transparent at low temperature | Transparent at low temperature | Transparent at low temperature | Transparent at low temperature |
| **Appearance after gelation or at 37°C** | Slightly yellow and opaque after gelation | Slightly yellow and opaque after gelation | Slightly yellow and opaque after gelation | Slightly yellow and opaque after gelation | Slightly yellow and opaque after gelation | Slightly yellow and opaque after gelation | Slightly yellow and opaque at 37°C but without gelation | Slightly yellow and opaque at 37°C but without gelation |
| **Gelation at 37°C** | Yes | Yes | Yes | Yes | Yes | Yes | No | No |
| **Clinical suitability** | Not selected; low carteolol loading | Not selected; low carteolol loading | Not selected; low carteolol loading | Acceptable but lower carteolol loading | Acceptable but lower carteolol loading | Selected final clinical formulation | Not selected; impaired gelation | Not selected; impaired gelation |

Note: HBC, hydroxybutyl chitosan. A 1 mL aliquot of thermosensitive HBC dressing was mixed with different volumes of 2% carteolol ophthalmic solution. Gelation temperature was determined using the test-tube inversion method after equilibration at 4°C and stepwise heating from 10°C. The 10:6 ratio was selected because it represented the highest carteolol-containing ratio that maintained homogeneous mixing, absence of visible precipitation, and stable gelation at 37°C. Ratios of 10:7 and 10:8 were not selected because they failed to gel at 37°C.
